# Supplementary material for: Periodic mesoporous organosilicas for ultra-high selective copper(ii) detection and sensing mechanism
Source: Royal Society of Chemistry journal article supplement (doi:10.1039/c3ta14314g), 2013-11-07
Supplement: c3ta14314g.pdf [file c3ta14314g.pdf]

*Electronic Supporting Information*

**Periodic Mesoporous Organosilicas for Ultrahigh Selective  
Copper(II) Detection and The Sensing Mechanism**

Xiaoyong Qiu,<sup>a</sup> Shuhua Han,<sup>a\*</sup> Yongfeng Hu,<sup>b</sup> Meng Gao,<sup>a</sup> Hui Wang<sup>a</sup>

*<sup>a</sup>Key Lab of Colloid and Interface Chemistry, Shandong University, Ministry of  
Education, Jinan 250100, P. R. China*

*<sup>b</sup>Canadian Light Source 44 Innovation Boulevard Saskatoon, SK, S7N 2V3,  
Canada*

**\*To whom correspondence should be addressed: e-mail [shuhhan@sdu.edu.cn](mailto:shuhhan@sdu.edu.cn);**

**Tel +86-531-88365450; Fax +86-531-88564464.**

## 1. <sup>1</sup>H NMR Spectra of BRh and BRh-Si<sub>4</sub>.

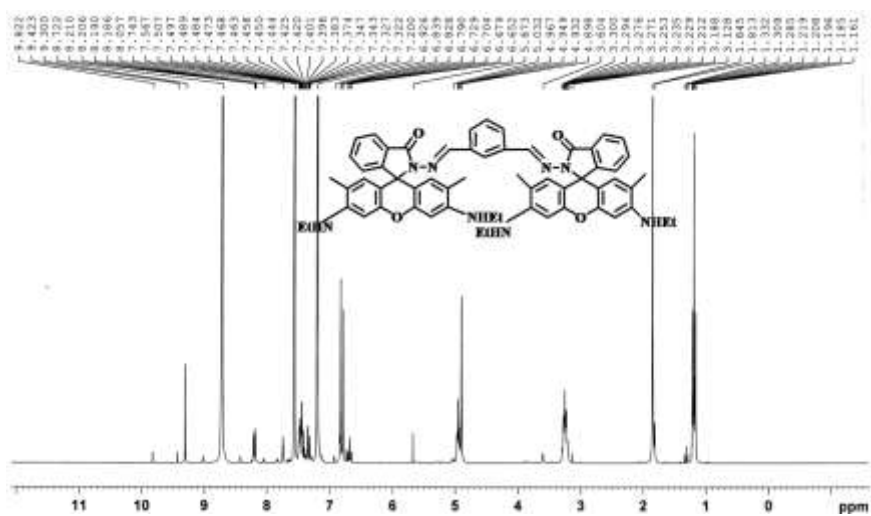

**Figure S1.** <sup>1</sup>H NMR spectrum of BRh.

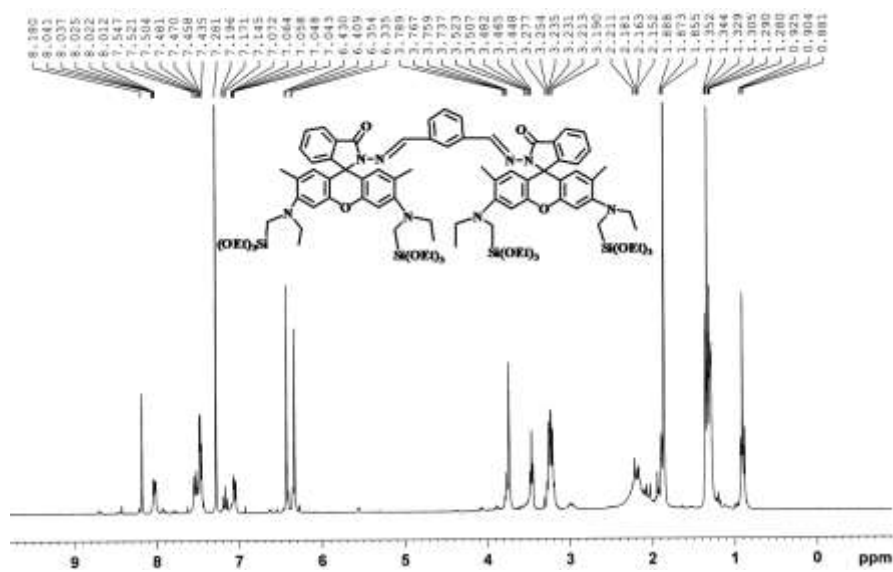

**Figure S2.** <sup>1</sup>H NMR spectrum of BRh-Si<sub>4</sub>.

## 2. Structural Characterization of BRhPMOs.

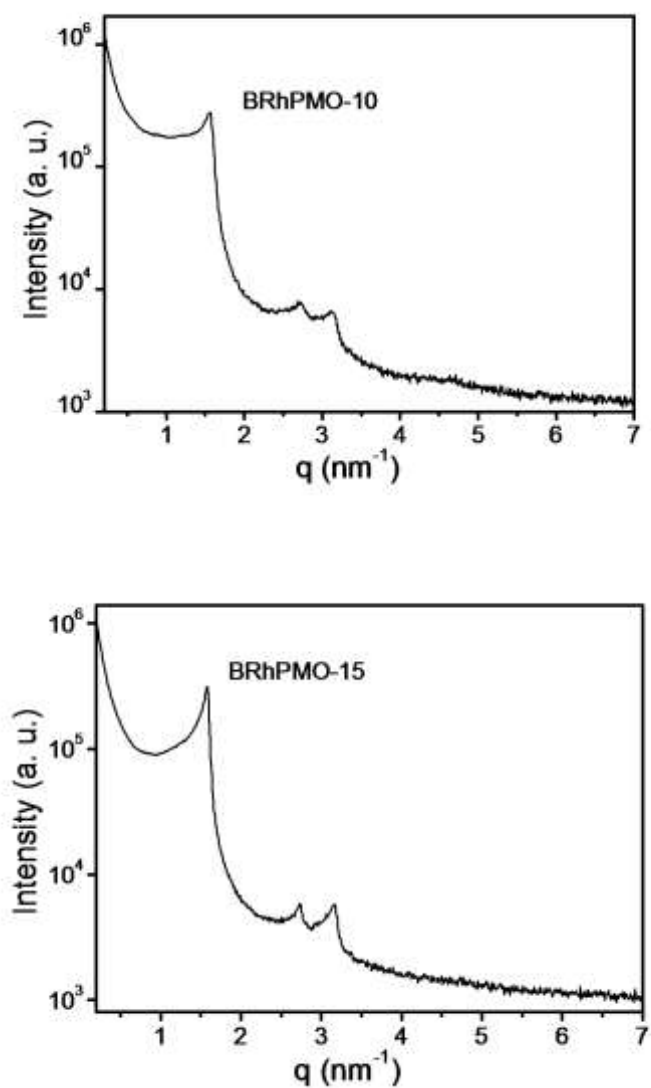

**Figure S3.** Small angle X-ray scattering (SAXS) patterns for solvent-extracted BRhPMO-10 and BRhPMO-15.

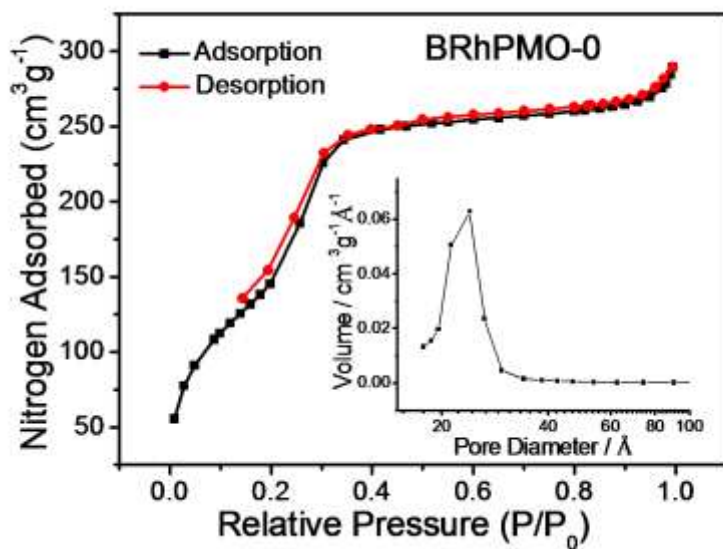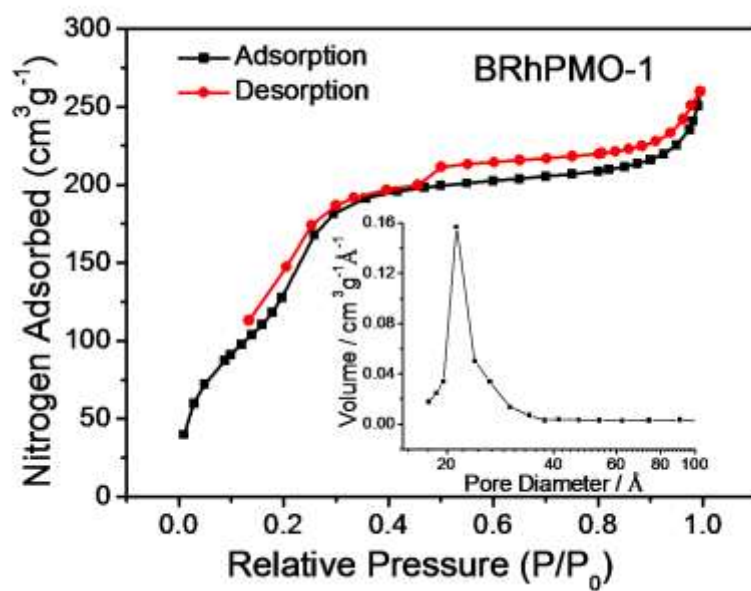

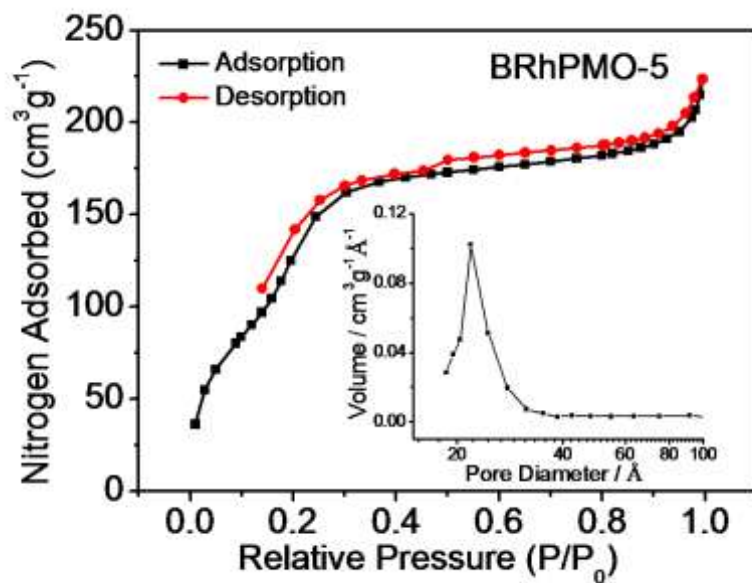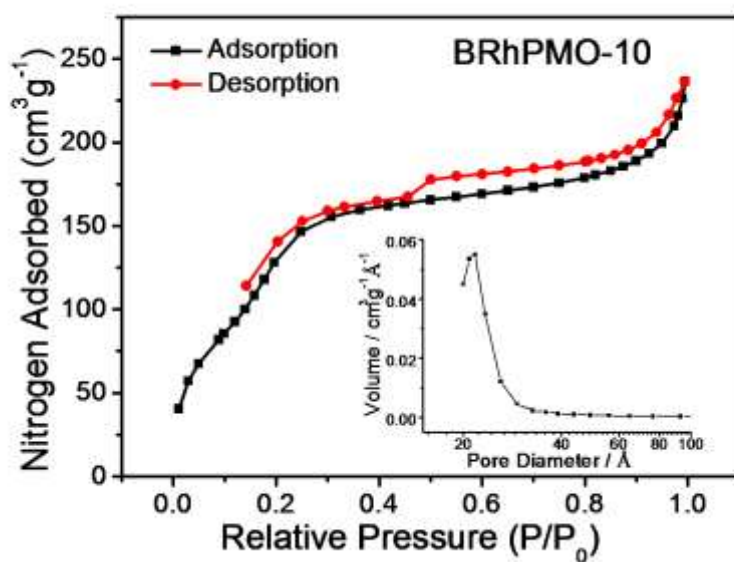

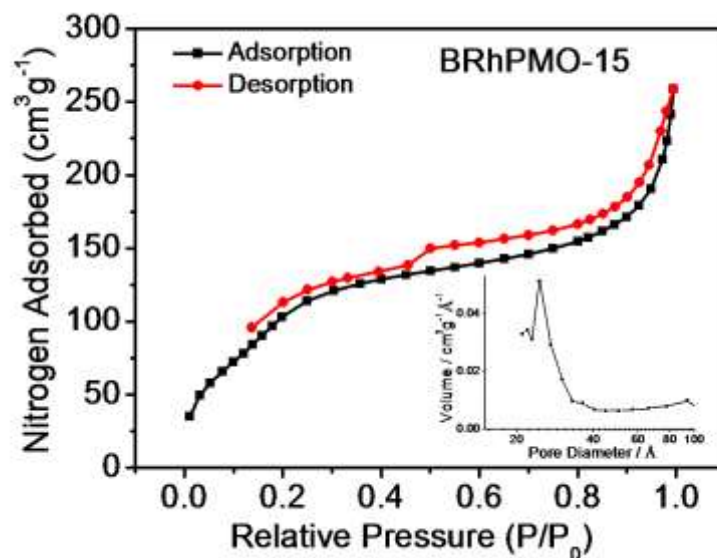

**Figure S4.** Nitrogen adsorption/desorption isotherms and pore size distribution of solvent-extracted BRhPMOs.

The BET surface areas, pore volume, and BJH pore diameter for BRhPMO-1 were calculated to be  $643 \text{ m}^2 \text{ g}^{-1}$ ,  $0.45 \text{ cm}^3 \text{ g}^{-1}$ , and  $2.78 \text{ nm}$ , respectively. For BRhPMO-5, these values were  $579 \text{ m}^2 \text{ g}^{-1}$ ,  $0.41 \text{ cm}^3 \text{ g}^{-1}$ , and  $2.75 \text{ nm}$ , while for BRhPMO-15, these values were  $413 \text{ m}^2 \text{ g}^{-1}$ ,  $0.39 \text{ cm}^3 \text{ g}^{-1}$ , and  $4.41 \text{ nm}$  respectively.

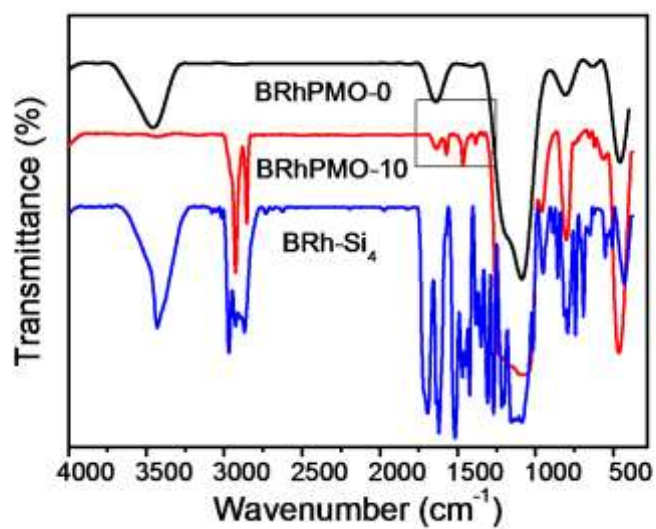

**Figure S5.** FT-IR spectra of BRh-Si<sub>4</sub>, solvent-extracted BRhPMO-0 and BRhPMO-10.

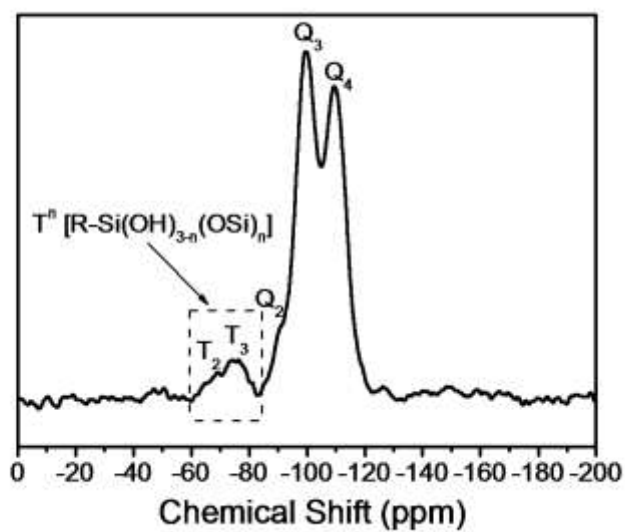

**Figure S6.** <sup>29</sup>Si MAS NMR spectrum of solvent-extracted BRhPMO-10.

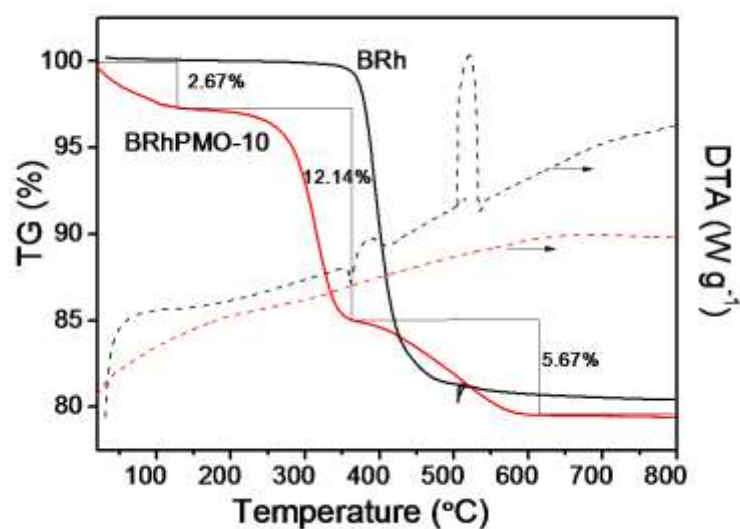

**Figure S7.** Thermal analysis for BRh and solvent-extracted BRhPMO-10: TG curves (solid line) and DTA curves (dash line).

### 3. Optical Characterization of BRhPMOs.

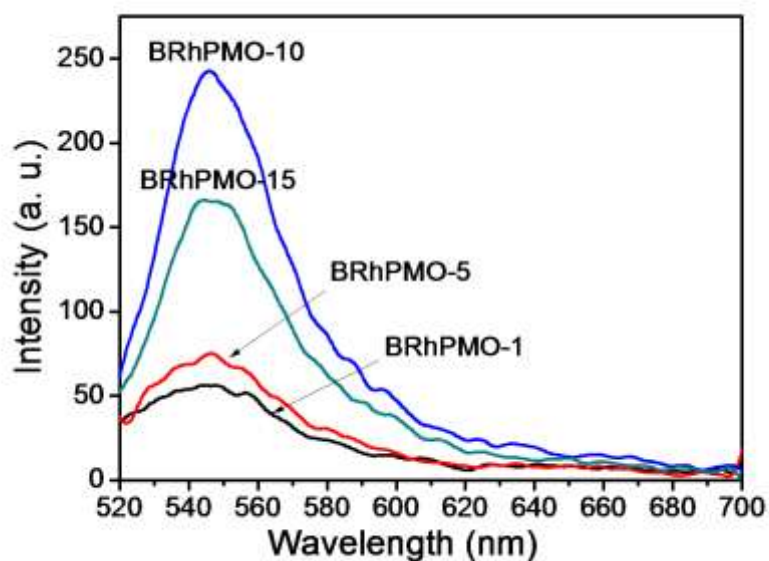

**Figure S8.** Fluorescence response of BRhPMOs with different BRh-Si<sub>4</sub>/TEOS molar ratios upon the addition of Cu<sup>2+</sup> (10<sup>-4</sup> M) in C<sub>2</sub>H<sub>5</sub>OH/HEPES (8:2 v/v, pH 6.8).



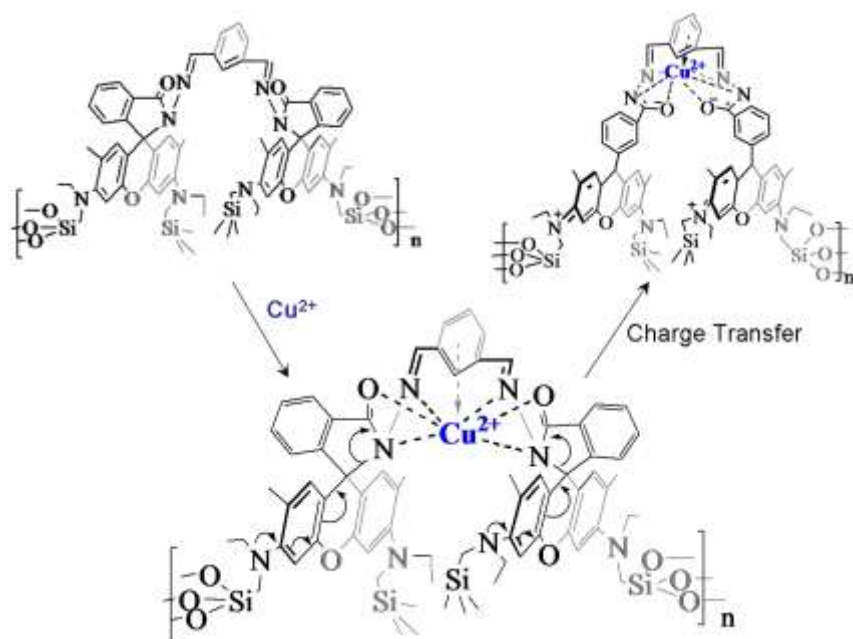

**Figure S9.** The mechanism for Cu<sup>2+</sup>-induced ring-opening of BRh units in BRhPMOs.

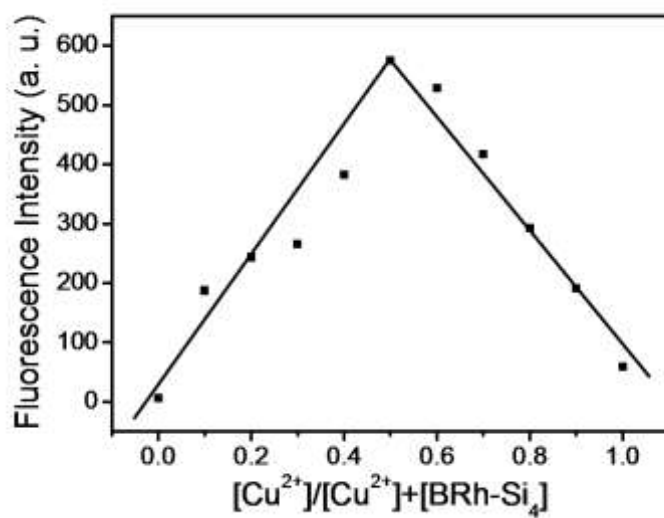

**Figure S10.** Job's plot for BRh-Si<sub>4</sub> and Cu<sup>2+</sup> in THF. The total concentration of BRh-Si<sub>4</sub> and copper ion was 1.0×10<sup>-4</sup> M.

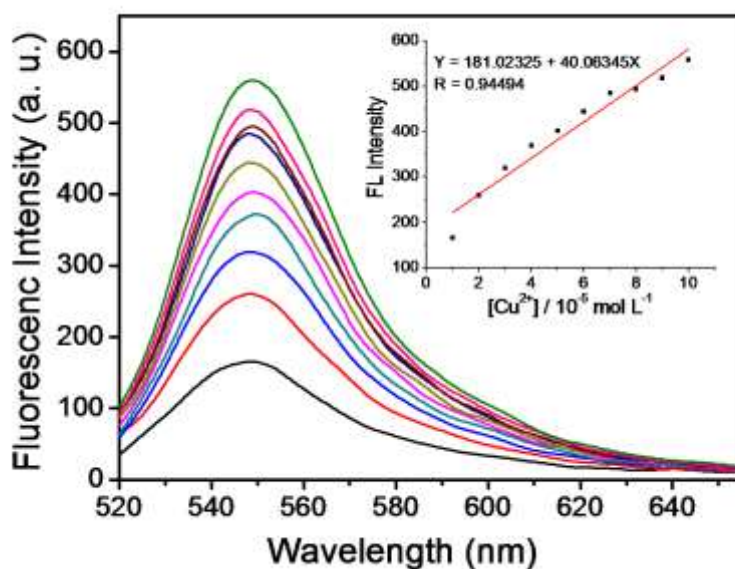

**Figure S11.** Fluorescence response of BRhPMOs ( $0.1 \text{ mg mL}^{-1}$ ) upon the addition of  $\text{Cu}^{2+}$  in  $\text{C}_2\text{H}_5\text{OH/HEPES}$  (8:2 v/v, pH 6.8). Inset: emission intensity at 548 nm of BRhPMOs ( $0.1 \text{ mg mL}^{-1}$ ) as a function of  $\text{Cu}^{2+}$  concentration in  $10^{-5} \text{ M}$  range ( $1.0 \times 10^{-5}$  to  $10 \times 10^{-5} \text{ M}$ ). Excitation at 500 nm.
